# Supplementary material for: Manifestation of helicity in one-dimensional iodobismuthate
Source: Royal Society of Chemistry journal article supplement (doi:10.1039/c6dt01032f), 2016-01-01
Supplement: c6dt01032f1.pdf [file c6dt01032f1.pdf]

## Manifestation of helicity in one-dimensional iodobismuthate

Souvik Pandey, Alex P. Andrews and Ajay Venugopal\*

### Supplementary Information

#### Experimental Methods

The reactions were performed under ambient conditions.  $\text{Bi}(\text{NO}_3)_3(\text{H}_2\text{O})_5$  and 2,6-diisopropylaniline were purchased from Sigma Aldrich and used as received. Elemental analysis was carried out on the vario MICRO cube elemental analyser. The FT-IR spectrum was recorded using KBr pellets in the range of  $4000\text{--}400\text{ cm}^{-1}$  on a SHIMADZU FT-IR spectrometer. Thermogravimetric analysis (TGA) was performed using a SDT Q600 (Shimadzu) analyser under nitrogen flow and heating rate was maintained at  $10\text{ }^\circ\text{C}$  per minute. The diffuse reflectance spectra were recorded at room temperature on a computer-controlled Shimadzu UV/Vis/NIR spectrophotometer. A  $\text{BaSO}_4$  plate was used as reference, on which the finely ground powders (5 % (w/w)) of the samples were coated. Optical band gaps were calculated from UV-Vis diffuse reflectance spectra using the Kubelka-Munk function where  $E$  = Energy,  $\alpha$  = absorption coefficient,  $h$  = Planck's constant,  $\nu$  = frequency.<sup>1</sup> Single-crystal X-ray crystallography for structural analysis was performed with a Bruker Kappa Apex-II CCD diffractometer at 296 K, 85 K and  $\text{MoK}\alpha$  irradiation ( $\lambda = 0.71073\text{ \AA}$ ). The structures were solved by direct methods with SIR-92,<sup>2</sup> SHELXS-97, or SHELX-2013.<sup>3</sup> Powder XRD measurement was performed on a X'pert PRO (PANalytics) powder diffractometer equipped with  $\text{Cu K}\alpha$  radiation ( $1.540598\text{ \AA}$ ). Piezoelectric measurement was performed on  $\text{D}_{33}$  meter (APC International, part no. 902030). 1 mm thick pellets of compound **1** were used for the measurements. The cif files of the single crystal XRD measurements can be obtained from [www.ccdc.cam.ac.uk/data\\_request/cif](http://www.ccdc.cam.ac.uk/data_request/cif). CCDC 1468858 (**1** at 85K), CCDC 1468859 (**1** at 296 K).

**Crystal data and structure refinement for 1.**

Identification code **1**  
Empirical formula  $C_{12}H_{20}BiI_4N$   
Formula weight 894.87  
Temperature 296(2) K  
Wavelength 0.71073 Å  
Crystal system Orthorhombic  
Space group  $C222_1$   
Unit cell dimensions  $a = 17.363(2)$  Å  $\alpha = 90^\circ$ .  
 $b = 24.704(3)$  Å  $\beta = 90^\circ$ .  
 $c = 9.8942(10)$  Å  $\gamma = 90^\circ$ .  
Volume 4244.0(9) Å<sup>3</sup>  
Z 8  
Density (calculated) 2.801 Mg/m<sup>3</sup>  
Absorption coefficient 14.117 mm<sup>-1</sup>  
F(000) 3152  
Crystal size 0.150 x 0.100 x 0.100 mm<sup>3</sup>  
Theta range for data collection 2.638 to 25.000°.  
Index ranges  $-18 \leq h \leq 20$ ,  $-29 \leq k \leq 26$ ,  $-11 \leq l \leq 11$   
Reflections collected 9045  
Independent reflections 3730 [R(int) = 0.0276]  
Completeness to theta = 25.242° 97.6 %  
Absorption correction Semi-empirical from equivalents  
Max. and min. transmission 0.333 and 0.226  
Refinement method Full-matrix least-squares on F<sup>2</sup>  
Data / restraints / parameters 3730 / 5 / 168  
Goodness-of-fit on F2 0.890  
Final R indices [ $I > 2\sigma(I)$ ] R1 = 0.0286, wR2 = 0.0570  
R indices (all data) R1 = 0.0440, wR2 = 0.0618  
Absolute structure parameter 0.057(7)  
Largest diff. peak and hole 1.347 and -0.609 e.Å<sup>-3</sup>

**Table T1: Bond lengths [Å] and angles [°] for 1.**

---

|             |           |
|-------------|-----------|
| C(1)-C(2)   | 1.328(16) |
| C(1)-C(2)#1 | 1.328(16) |

|               |           |
|---------------|-----------|
| C(1)-N(1)     | 1.51(2)   |
| C(2)-C(3)     | 1.46(2)   |
| C(2)-C(5)     | 1.606(17) |
| C(3)-C(4)     | 1.34(2)   |
| C(3)-H(3)     | 0.9300    |
| C(4)-C(3)#1   | 1.34(2)   |
| C(4)-H(4)     | 0.9300    |
| C(5)-C(6)     | 1.501(12) |
| C(5)-C(7)     | 1.51(2)   |
| C(5)-H(5)     | 0.9800    |
| C(6)-H(6A)    | 0.9600    |
| C(6)-H(6B)    | 0.9600    |
| C(6)-H(6C)    | 0.9600    |
| C(7)-H(7A)    | 0.9600    |
| C(7)-H(7B)    | 0.9600    |
| C(7)-H(7C)    | 0.9600    |
| C(8)-C(9)     | 1.370(16) |
| C(8)-C(9)#2   | 1.370(16) |
| C(8)-N(2)     | 1.51(2)   |
| C(9)-C(10)    | 1.40(2)   |
| C(9)-C(12)    | 1.632(19) |
| C(10)-C(11)   | 1.357(19) |
| C(10)-H(10)   | 0.9300    |
| C(11)-C(10)#2 | 1.357(19) |
| C(11)-H(11)   | 0.9300    |
| C(12)-C(13)   | 1.513(12) |
| C(12)-C(14)   | 1.47(2)   |
| C(12)-H(12)   | 0.9800    |
| C(13)-H(13A)  | 0.9600    |
| C(13)-H(13B)  | 0.9600    |
| C(13)-H(13C)  | 0.9600    |
| C(14)-H(14A)  | 0.9600    |
| C(14)-H(14B)  | 0.9600    |
| C(14)-H(14C)  | 0.9600    |
| N(1)-H(1A)    | 0.8900    |
| N(1)-H(1B)    | 0.8900    |

|                  |            |
|------------------|------------|
| N(1)-H(1C)       | 0.8900     |
| N(2)-H(2A)       | 0.8900     |
| N(2)-H(2B)       | 0.8900     |
| N(2)-H(2C)       | 0.8900     |
| I(1)-Bi(3)       | 3.0674(10) |
| I(1)-Bi(3)#3     | 3.3879(10) |
| I(2)-Bi(3)       | 2.8822(11) |
| I(3)-Bi(3)       | 2.8969(13) |
| I(4)-Bi(3)       | 3.0803(9)  |
| I(4)-Bi(3)#4     | 3.3819(12) |
| Bi(3)-I(4)#4     | 3.3819(12) |
| Bi(3)-I(1)#3     | 3.3878(10) |
|                  |            |
| C(2)-C(1)-C(2)#1 | 129.8(19)  |
| C(2)-C(1)-N(1)   | 115.1(9)   |
| C(2)#1-C(1)-N(1) | 115.1(9)   |
| C(1)-C(2)-C(3)   | 114.0(15)  |
| C(1)-C(2)-C(5)   | 128.1(15)  |
| C(3)-C(2)-C(5)   | 118.0(15)  |
| C(4)-C(3)-C(2)   | 120(2)     |
| C(4)-C(3)-H(3)   | 119.9      |
| C(2)-C(3)-H(3)   | 119.9      |
| C(3)-C(4)-C(3)#1 | 122(3)     |
| C(3)-C(4)-H(4)   | 119.1      |
| C(3)#1-C(4)-H(4) | 119.1      |
| C(6)-C(5)-C(7)   | 113.3(16)  |
| C(6)-C(5)-C(2)   | 107.8(13)  |
| C(7)-C(5)-C(2)   | 111.0(13)  |
| C(6)-C(5)-H(5)   | 108.2      |
| C(7)-C(5)-H(5)   | 108.2      |
| C(2)-C(5)-H(5)   | 108.2      |
| C(5)-C(6)-H(6A)  | 109.5      |
| C(5)-C(6)-H(6B)  | 109.5      |
| H(6A)-C(6)-H(6B) | 109.5      |
| C(5)-C(6)-H(6C)  | 109.5      |
| H(6A)-C(6)-H(6C) | 109.5      |

|                     |           |
|---------------------|-----------|
| H(6B)-C(6)-H(6C)    | 109.5     |
| C(5)-C(7)-H(7A)     | 109.5     |
| C(5)-C(7)-H(7B)     | 109.5     |
| H(7A)-C(7)-H(7B)    | 109.5     |
| C(5)-C(7)-H(7C)     | 109.5     |
| H(7A)-C(7)-H(7C)    | 109.5     |
| H(7B)-C(7)-H(7C)    | 109.5     |
| C(9)-C(8)-C(9)#2    | 127.5(19) |
| C(9)-C(8)-N(2)      | 116.3(10) |
| C(9)#2-C(8)-N(2)    | 116.3(10) |
| C(8)-C(9)-C(10)     | 114.6(16) |
| C(8)-C(9)-C(12)     | 124.6(14) |
| C(10)-C(9)-C(12)    | 120.8(14) |
| C(11)-C(10)-C(9)    | 120.4(19) |
| C(11)-C(10)-H(10)   | 119.8     |
| C(9)-C(10)-H(10)    | 119.8     |
| C(10)#2-C(11)-C(10) | 122(3)    |
| C(10)#2-C(11)-H(11) | 118.9     |
| C(10)-C(11)-H(11)   | 118.9     |
| C(13)-C(12)-C(14)   | 115.0(18) |
| C(13)-C(12)-C(9)    | 102.7(13) |
| C(14)-C(12)-C(9)    | 111.2(16) |
| C(13)-C(12)-H(12)   | 109.3     |
| C(14)-C(12)-H(12)   | 109.3     |
| C(9)-C(12)-H(12)    | 109.3     |
| C(12)-C(13)-H(13A)  | 109.5     |
| C(12)-C(13)-H(13B)  | 109.5     |
| H(13A)-C(13)-H(13B) | 109.5     |
| C(12)-C(13)-H(13C)  | 109.5     |
| H(13A)-C(13)-H(13C) | 109.5     |
| H(13B)-C(13)-H(13C) | 109.5     |
| C(12)-C(14)-H(14A)  | 109.5     |
| C(12)-C(14)-H(14B)  | 109.5     |
| H(14A)-C(14)-H(14B) | 109.5     |
| C(12)-C(14)-H(14C)  | 109.5     |
| H(14A)-C(14)-H(14C) | 109.5     |

|                     |           |
|---------------------|-----------|
| H(14B)-C(14)-H(14C) | 109.5     |
| C(1)-N(1)-H(1A)     | 109.5     |
| C(1)-N(1)-H(1B)     | 109.5     |
| H(1A)-N(1)-H(1B)    | 109.5     |
| C(1)-N(1)-H(1C)     | 109.5     |
| H(1A)-N(1)-H(1C)    | 109.5     |
| H(1B)-N(1)-H(1C)    | 109.5     |
| C(8)-N(2)-H(2A)     | 109.5     |
| C(8)-N(2)-H(2B)     | 109.5     |
| H(2A)-N(2)-H(2B)    | 109.5     |
| C(8)-N(2)-H(2C)     | 109.5     |
| H(2A)-N(2)-H(2C)    | 109.5     |
| H(2B)-N(2)-H(2C)    | 109.5     |
| Bi(3)-I(1)-Bi(3)#3  | 90.50(2)  |
| Bi(3)-I(4)-Bi(3)#4  | 91.43(3)  |
| I(2)-Bi(3)-I(3)     | 95.44(4)  |
| I(2)-Bi(3)-I(1)     | 91.22(3)  |
| I(3)-Bi(3)-I(1)     | 96.44(4)  |
| I(2)-Bi(3)-I(4)     | 96.65(3)  |
| I(3)-Bi(3)-I(4)     | 91.04(3)  |
| I(1)-Bi(3)-I(4)     | 168.59(3) |
| I(2)-Bi(3)-I(4)#4   | 84.95(3)  |
| I(3)-Bi(3)-I(4)#4   | 179.34(3) |
| I(1)-Bi(3)-I(4)#4   | 84.08(3)  |
| I(4)-Bi(3)-I(4)#4   | 88.39(3)  |
| I(2)-Bi(3)-I(1)#3   | 179.28(3) |
| I(3)-Bi(3)-I(1)#3   | 84.07(3)  |
| I(1)-Bi(3)-I(1)#3   | 89.36(2)  |
| I(4)-Bi(3)-I(1)#3   | 82.84(3)  |
| I(4)#4-Bi(3)-I(1)#3 | 95.53(3)  |

---

Symmetry transformations used to generate equivalent atoms:

#1  $x, -y, -z+1$  #2  $-x+1, y, -z+1/2$  #3  $x, -y, -z+2$  #4  $-x, y, -z+5/2$

**Table T2. Hydrogen bonds for 1 [Å and °].**

| D-H...A             | d(D-H) | d(H...A) | d(D...A)   | <(DHA) |
|---------------------|--------|----------|------------|--------|
| N(1)-H(1A)...I(1)   | 0.89   | 3.35     | 4.182(9)   | 157.2  |
| N(1)-H(1B)...I(4)#3 | 0.89   | 3.07     | 3.747(13)  | 133.8  |
| N(1)-H(1C)...I(3)#5 | 0.89   | 2.98     | 3.765(2)   | 147.4  |
| N(1)-H(1C)...I(4)#5 | 0.89   | 3.24     | 3.747(13)  | 118.8  |
| N(2)-H(2B)...I(2)#6 | 0.89   | 3.01     | 3.7297(18) | 139.5  |
| N(2)-H(2C)...I(1)#7 | 0.89   | 3.07     | 3.752(12)  | 135.0  |
| N(2)-H(2C)...I(2)#7 | 0.89   | 3.18     | 3.7297(18) | 121.9  |
| N(1)-H(1A)...I(1)   | 0.89   | 3.35     | 4.182(9)   | 157.2  |
| N(1)-H(1B)...I(4)#3 | 0.89   | 3.07     | 3.747(13)  | 133.8  |
| N(1)-H(1C)...I(3)#5 | 0.89   | 2.98     | 3.765(2)   | 147.4  |
| N(1)-H(1C)...I(4)#5 | 0.89   | 3.24     | 3.747(13)  | 118.8  |
| N(2)-H(2B)...I(2)#6 | 0.89   | 3.01     | 3.7297(18) | 139.5  |
| N(2)-H(2C)...I(1)#7 | 0.89   | 3.07     | 3.752(12)  | 135.0  |
| N(2)-H(2C)...I(2)#7 | 0.89   | 3.18     | 3.7297(18) | 121.9  |

Symmetry transformations used to generate equivalent atoms:

#1  $x, -y, -z+1$  #2  $-x+1, y, -z+1/2$  #3  $x, -y, -z+2$   
#4  $-x, y, -z+5/2$  #5  $x, y, z-1$  #6  $x+1/2, -y+1/2, -z+1$   
#7  $-x+1/2, -y+1/2, z-1/2$

## Solid state structure and experimental details of 2

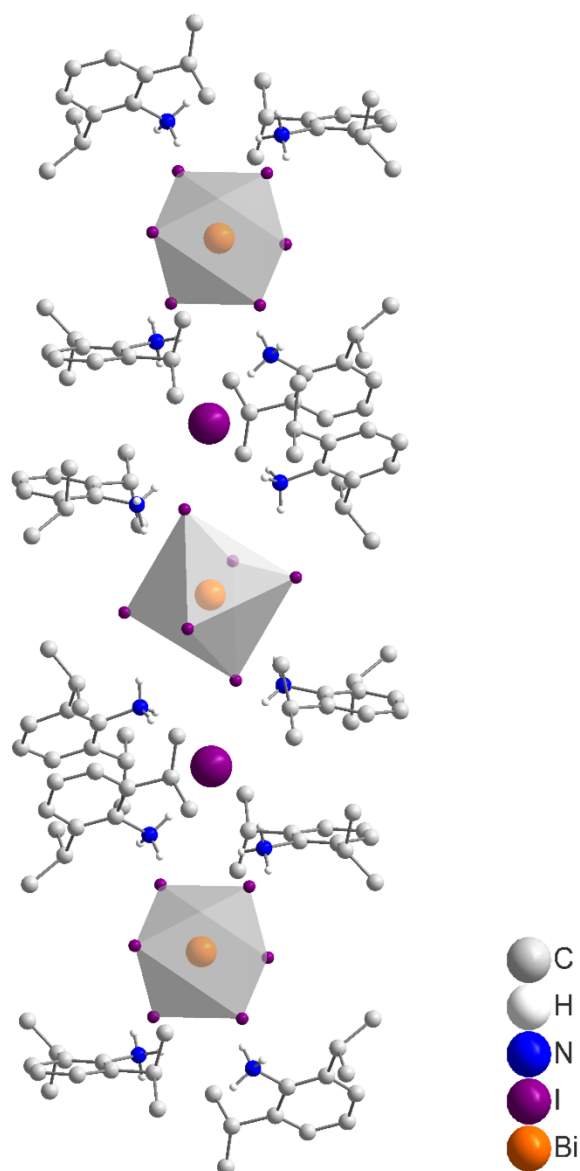

Figure S1: molecular structure of compound [2,6-diisopropylanilinium]<sub>4</sub>[Bi<sub>6</sub>][I] (**2**). Discrete [Bi<sub>6</sub>] units have been presented as octahedrons.

**Experimental details of compound 2:** Compound **2** was obtained by following the same reaction procedure as **1**. An excess of HI (1.8 mmol) was added and the red coloured crystals were obtained from the methanol solution.

Yield 85% (according to bismuth). Elemental analysis calculated for C<sub>48</sub>H<sub>80</sub>N<sub>4</sub>Bi<sub>7</sub> C 31.84, H 4.45, N 3.09 and found C = 31.46, H = 4.21, N = 3.15. IR analysis: 3062(m), 2960(s), 2872(s), 2507(w), 1562(m), 1467(s), 1342(w), 1012(w), 794(m), 720(w).

### Crystal data and structure refinement for 2.

|                     |                                                                |
|---------------------|----------------------------------------------------------------|
| Identification code | <b>2</b>                                                       |
| Empirical formula   | C <sub>48</sub> H <sub>80</sub> Bi <sub>7</sub> N <sub>4</sub> |
| Formula weight      | 1810.44                                                        |



Temperature 296(2) K  
 Wavelength 0.71073 Å  
 Crystal system Monoclinic  
 Space group C2/c  
 Unit cell dimensions a = 18.372(3) Å  $\alpha = 90^\circ$ .  
 b = 18.431(2) Å  $\beta = 101.319(9)^\circ$ .  
 c = 19.530(3) Å  $\gamma = 90^\circ$ .  
 Volume 6484.4(15) Å<sup>3</sup>  
 Z 4  
 Density (calculated) 1.854 Mg/m<sup>3</sup>  
 Absorption coefficient 6.082 mm<sup>-1</sup>  
 F(000) 3400  
 Crystal size 0.150 x 0.150 x 0.100 mm<sup>3</sup>  
 Theta range for data collection 2.823 to 25.999°.  
 Index ranges -22 ≤ h ≤ 22, -22 ≤ k ≤ 22, -23 ≤ l ≤ 24  
 Reflections collected 24638  
 Independent reflections 6234 [R(int) = 0.0489]  
 Completeness to theta = 25.242° 97.8 %  
 Absorption correction Semi-empirical from equivalents  
 Max. and min. transmission 0.581 and 0.462  
 Refinement method Full-matrix least-squares on F<sup>2</sup>  
 Data / restraints / parameters 6234 / 1 / 283  
 Goodness-of-fit on F<sup>2</sup> 1.030  
 Final R indices [I > 2σ(I)] R1 = 0.0418, wR2 = 0.0864  
 R indices (all data) R1 = 0.0922, wR2 = 0.1062  
 Extinction coefficient n/a  
 Largest diff. peak and hole 1.063 and -1.163 e.Å<sup>-3</sup>

**Table T3: Bond lengths [Å] and angles [°] for 2.**

---

|              |           |
|--------------|-----------|
| C(1)-C(6)    | 1.382(10) |
| C(1)-C(2)    | 1.386(11) |
| C(1)-N(1)    | 1.476(9)  |
| C(2)-C(3)    | 1.379(11) |
| C(2)-C(7)    | 1.524(11) |
| C(3)-C(4)    | 1.377(13) |
| C(3)-H(3)    | 0.9300    |
| C(4)-C(5)    | 1.353(13) |
| C(4)-H(4)    | 0.9300    |
| C(5)-C(6)    | 1.394(11) |
| C(5)-H(5)    | 0.9300    |
| C(6)-C(10)   | 1.532(13) |
| C(7)-C(8)    | 1.513(12) |
| C(7)-C(9)    | 1.539(13) |
| C(7)-H(7)    | 0.9800    |
| C(8)-H(8A)   | 0.9600    |
| C(8)-H(8B)   | 0.9600    |
| C(8)-H(8C)   | 0.9600    |
| C(9)-H(9A)   | 0.9600    |
| C(9)-H(9B)   | 0.9600    |
| C(9)-H(9C)   | 0.9600    |
| C(10)-C(12)  | 1.454(16) |
| C(10)-C(11)  | 1.463(15) |
| C(10)-H(10)  | 0.9800    |
| C(11)-H(11A) | 0.9600    |
| C(11)-H(11B) | 0.9600    |
| C(11)-H(11C) | 0.9600    |
| C(12)-H(12A) | 0.9600    |
| C(12)-H(12B) | 0.9600    |
| C(12)-H(12C) | 0.9600    |
| C(13)-C(18)  | 1.366(11) |
| C(13)-C(14)  | 1.419(11) |
| C(13)-N(2)   | 1.500(9)  |

|              |           |
|--------------|-----------|
| C(14)-C(15)  | 1.390(12) |
| C(14)-C(19)  | 1.493(13) |
| C(15)-C(16)  | 1.365(13) |
| C(15)-H(15)  | 0.9300    |
| C(16)-C(17)  | 1.360(12) |
| C(16)-H(16)  | 0.9300    |
| C(17)-C(18)  | 1.371(11) |
| C(17)-H(17)  | 0.9300    |
| C(18)-C(22)  | 1.514(11) |
| C(19)-C(20)  | 1.467(17) |
| C(19)-C(21)  | 1.550(19) |
| C(19)-H(19)  | 0.9800    |
| C(20)-H(20A) | 0.9600    |
| C(20)-H(20B) | 0.9600    |
| C(20)-H(20C) | 0.9600    |
| C(21)-H(21A) | 0.9600    |
| C(21)-H(21B) | 0.9600    |
| C(21)-H(21C) | 0.9600    |
| C(22)-C(23)  | 1.521(13) |
| C(22)-C(24)  | 1.531(13) |
| C(22)-H(22)  | 0.9800    |
| C(23)-H(23A) | 0.9600    |
| C(23)-H(23B) | 0.9600    |
| C(23)-H(23C) | 0.9600    |
| C(24)-H(24A) | 0.9600    |
| C(24)-H(24B) | 0.9600    |
| C(24)-H(24C) | 0.9600    |
| N(1)-H(1A)   | 0.8900    |
| N(1)-H(1B)   | 0.8900    |
| N(1)-H(1C)   | 0.8900    |
| N(2)-H(2A)   | 0.8900    |
| N(2)-H(2B)   | 0.8900    |
| N(2)-H(2C)   | 0.8900    |
| I(1)-Bi(1)   | 3.0913(6) |
| I(2)-Bi(1)   | 3.0700(6) |
| I(3)-Bi(1)   | 3.0798(6) |

|                  |           |
|------------------|-----------|
| Bi(1)-I(2)#1     | 3.0701(6) |
| Bi(1)-I(3)#1     | 3.0798(6) |
| Bi(1)-I(1)#1     | 3.0913(6) |
|                  |           |
| C(6)-C(1)-C(2)   | 124.6(7)  |
| C(6)-C(1)-N(1)   | 117.7(7)  |
| C(2)-C(1)-N(1)   | 117.6(7)  |
| C(3)-C(2)-C(1)   | 116.2(8)  |
| C(3)-C(2)-C(7)   | 120.4(8)  |
| C(1)-C(2)-C(7)   | 123.4(7)  |
| C(4)-C(3)-C(2)   | 121.5(9)  |
| C(4)-C(3)-H(3)   | 119.3     |
| C(2)-C(3)-H(3)   | 119.3     |
| C(5)-C(4)-C(3)   | 119.9(9)  |
| C(5)-C(4)-H(4)   | 120.0     |
| C(3)-C(4)-H(4)   | 120.0     |
| C(4)-C(5)-C(6)   | 122.1(9)  |
| C(4)-C(5)-H(5)   | 118.9     |
| C(6)-C(5)-H(5)   | 118.9     |
| C(1)-C(6)-C(5)   | 115.5(8)  |
| C(1)-C(6)-C(10)  | 122.8(8)  |
| C(5)-C(6)-C(10)  | 121.6(8)  |
| C(8)-C(7)-C(2)   | 110.5(7)  |
| C(8)-C(7)-C(9)   | 111.0(8)  |
| C(2)-C(7)-C(9)   | 110.6(8)  |
| C(8)-C(7)-H(7)   | 108.2     |
| C(2)-C(7)-H(7)   | 108.2     |
| C(9)-C(7)-H(7)   | 108.2     |
| C(7)-C(8)-H(8A)  | 109.5     |
| C(7)-C(8)-H(8B)  | 109.5     |
| H(8A)-C(8)-H(8B) | 109.5     |
| C(7)-C(8)-H(8C)  | 109.5     |
| H(8A)-C(8)-H(8C) | 109.5     |
| H(8B)-C(8)-H(8C) | 109.5     |
| C(7)-C(9)-H(9A)  | 109.5     |
| C(7)-C(9)-H(9B)  | 109.5     |

|                     |           |
|---------------------|-----------|
| H(9A)-C(9)-H(9B)    | 109.5     |
| C(7)-C(9)-H(9C)     | 109.5     |
| H(9A)-C(9)-H(9C)    | 109.5     |
| H(9B)-C(9)-H(9C)    | 109.5     |
| C(12)-C(10)-C(11)   | 114.4(13) |
| C(12)-C(10)-C(6)    | 112.5(10) |
| C(11)-C(10)-C(6)    | 111.8(10) |
| C(12)-C(10)-H(10)   | 105.8     |
| C(11)-C(10)-H(10)   | 105.8     |
| C(6)-C(10)-H(10)    | 105.8     |
| C(10)-C(11)-H(11A)  | 109.5     |
| C(10)-C(11)-H(11B)  | 109.5     |
| H(11A)-C(11)-H(11B) | 109.5     |
| C(10)-C(11)-H(11C)  | 109.5     |
| H(11A)-C(11)-H(11C) | 109.5     |
| H(11B)-C(11)-H(11C) | 109.5     |
| C(10)-C(12)-H(12A)  | 109.5     |
| C(10)-C(12)-H(12B)  | 109.5     |
| H(12A)-C(12)-H(12B) | 109.5     |
| C(10)-C(12)-H(12C)  | 109.5     |
| H(12A)-C(12)-H(12C) | 109.5     |
| H(12B)-C(12)-H(12C) | 109.5     |
| C(18)-C(13)-C(14)   | 124.5(8)  |
| C(18)-C(13)-N(2)    | 119.6(7)  |
| C(14)-C(13)-N(2)    | 115.9(7)  |
| C(15)-C(14)-C(13)   | 114.4(8)  |
| C(15)-C(14)-C(19)   | 122.5(8)  |
| C(13)-C(14)-C(19)   | 123.1(8)  |
| C(16)-C(15)-C(14)   | 122.5(9)  |
| C(16)-C(15)-H(15)   | 118.8     |
| C(14)-C(15)-H(15)   | 118.8     |
| C(17)-C(16)-C(15)   | 119.6(9)  |
| C(17)-C(16)-H(16)   | 120.2     |
| C(15)-C(16)-H(16)   | 120.2     |
| C(16)-C(17)-C(18)   | 122.5(9)  |
| C(16)-C(17)-H(17)   | 118.8     |

|                     |           |
|---------------------|-----------|
| C(18)-C(17)-H(17)   | 118.8     |
| C(13)-C(18)-C(17)   | 116.6(8)  |
| C(13)-C(18)-C(22)   | 122.4(8)  |
| C(17)-C(18)-C(22)   | 120.9(8)  |
| C(20)-C(19)-C(14)   | 114.3(12) |
| C(20)-C(19)-C(21)   | 109.4(13) |
| C(14)-C(19)-C(21)   | 109.0(10) |
| C(20)-C(19)-H(19)   | 108.0     |
| C(14)-C(19)-H(19)   | 108.0     |
| C(21)-C(19)-H(19)   | 108.0     |
| C(19)-C(20)-H(20A)  | 109.5     |
| C(19)-C(20)-H(20B)  | 109.5     |
| H(20A)-C(20)-H(20B) | 109.5     |
| C(19)-C(20)-H(20C)  | 109.5     |
| H(20A)-C(20)-H(20C) | 109.5     |
| H(20B)-C(20)-H(20C) | 109.5     |
| C(19)-C(21)-H(21A)  | 109.5     |
| C(19)-C(21)-H(21B)  | 109.5     |
| H(21A)-C(21)-H(21B) | 109.5     |
| C(19)-C(21)-H(21C)  | 109.5     |
| H(21A)-C(21)-H(21C) | 109.5     |
| H(21B)-C(21)-H(21C) | 109.5     |
| C(18)-C(22)-C(23)   | 109.3(8)  |
| C(18)-C(22)-C(24)   | 112.8(8)  |
| C(23)-C(22)-C(24)   | 113.2(9)  |
| C(18)-C(22)-H(22)   | 107.1     |
| C(23)-C(22)-H(22)   | 107.1     |
| C(24)-C(22)-H(22)   | 107.1     |
| C(22)-C(23)-H(23A)  | 109.5     |
| C(22)-C(23)-H(23B)  | 109.5     |
| H(23A)-C(23)-H(23B) | 109.5     |
| C(22)-C(23)-H(23C)  | 109.5     |
| H(23A)-C(23)-H(23C) | 109.5     |
| H(23B)-C(23)-H(23C) | 109.5     |
| C(22)-C(24)-H(24A)  | 109.5     |
| C(22)-C(24)-H(24B)  | 109.5     |

|                     |            |
|---------------------|------------|
| H(24A)-C(24)-H(24B) | 109.5      |
| C(22)-C(24)-H(24C)  | 109.5      |
| H(24A)-C(24)-H(24C) | 109.5      |
| H(24B)-C(24)-H(24C) | 109.5      |
| C(1)-N(1)-H(1A)     | 109.5      |
| C(1)-N(1)-H(1B)     | 109.5      |
| H(1A)-N(1)-H(1B)    | 109.5      |
| C(1)-N(1)-H(1C)     | 109.5      |
| H(1A)-N(1)-H(1C)    | 109.5      |
| H(1B)-N(1)-H(1C)    | 109.5      |
| C(13)-N(2)-H(2A)    | 109.5      |
| C(13)-N(2)-H(2B)    | 109.5      |
| H(2A)-N(2)-H(2B)    | 109.5      |
| C(13)-N(2)-H(2C)    | 109.5      |
| H(2A)-N(2)-H(2C)    | 109.5      |
| H(2B)-N(2)-H(2C)    | 109.5      |
| I(2)-Bi(1)-I(2)#1   | 180.0      |
| I(2)-Bi(1)-I(3)     | 88.179(18) |
| I(2)#1-Bi(1)-I(3)   | 91.820(18) |
| I(2)-Bi(1)-I(3)#1   | 91.821(18) |
| I(2)#1-Bi(1)-I(3)#1 | 88.180(18) |
| I(3)-Bi(1)-I(3)#1   | 180.0      |
| I(2)-Bi(1)-I(1)#1   | 90.518(17) |
| I(2)#1-Bi(1)-I(1)#1 | 89.482(17) |
| I(3)-Bi(1)-I(1)#1   | 92.67(2)   |
| I(3)#1-Bi(1)-I(1)#1 | 87.327(19) |
| I(2)-Bi(1)-I(1)     | 89.482(17) |
| I(2)#1-Bi(1)-I(1)   | 90.518(17) |
| I(3)-Bi(1)-I(1)     | 87.33(2)   |
| I(3)#1-Bi(1)-I(1)   | 92.67(2)   |
| I(1)#1-Bi(1)-I(1)   | 180.0      |

---

Symmetry transformations used to generate equivalent atoms:

#1 -x-1/2,-y+3/2,-z+1

**Table T4: Hydrogen bonds for 2 [Å and °].**

| D-H.....A           | d(D-H) | d(H...A) | d(D...A) | <(DHA) |
|---------------------|--------|----------|----------|--------|
| N(1)-H(1A)...I(1)#1 | 0.89   | 3.07     | 3.706(6) | 130.0  |
| N(1)-H(1B)...I(4)   | 0.89   | 2.70     | 3.490(6) | 148.8  |
| N(1)-H(1C)...I(2)   | 0.89   | 2.95     | 3.599(6) | 131.6  |
| N(1)-H(1A)...I(3)   | 0.89   | 2.97     | 3.601(6) | 129.2  |
| N(2)-H(2A)...I(2)#2 | 0.89   | 2.79     | 3.548(6) | 143.7  |
| N(2)-H(2B)...I(4)   | 0.89   | 2.77     | 3.558(6) | 148.4  |
| N(2)-H(2C)...I(1)#3 | 0.89   | 3.10     | 3.677(6) | 124.1  |
| N(2)-H(2C)...I(3)#3 | 0.89   | 3.06     | 3.735(7) | 133.8  |

Symmetry transformations used to generate equivalent atoms:

#1 -x-1/2,-y+3/2,-z+1 #2 -x,y,-z+3/2 #3 x+1/2,-y+3/2,z+1/2

**Thermo gravimetry Analysis Plot of compound 1:**

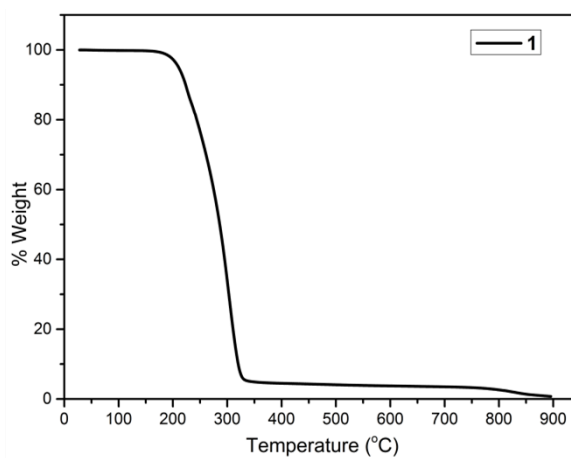

*Figure S2: TGA plot of 1*



Table T5: Bond lengths [Å] of **1** at 85 K and 296K

| Inter-atomic distances | 298 K (Å) | 85K (Å) | Change upon cooling (Å) |
|------------------------|-----------|---------|-------------------------|
| <b>I---I</b>           |           |         |                         |
| I2---I2'''             | 4.315     | 4.319   | 0.004                   |
| I1''---I2'             | 3.962     | 3.958   | 0.004                   |
| I1'---I4               | 4.261     | 4.268   | 0.007                   |
| I4'---I4''             | 4.945     | 4.969   | 0.026                   |
| <b>Bi---Bi</b>         |           |         |                         |
| Bi1---Bi2              | 4.583     | 4.588   | 0.005                   |
| Bi2---Bi3              | 4.631     | 4.638   | 0.007                   |
| <b>Bi-I</b>            |           |         |                         |
| Bi1-I1(bridged)        | 3.381     | 3.384   | 0.003                   |
| Bi1-I2(bridged)        | 3.063     | 3.069   | 0.006                   |
| Bi1-I3(terminal)       | 2.882     | 2.890   | 0.008                   |
| Bi1-I4(terminal)       | 2.894     | 2.903   | 0.009                   |
| Bi1-I'(bridged)        | 3.077     | 3.083   | 0.006                   |
| Bi1-I2'(bridged)       | 3.383     | 3.387   | 0.004                   |
| <b>N---I</b>           |           |         |                         |
| N2---I2'               | 4.159     | 4.144   | -0.015                  |
| N2---I1'               | 3.717     | 3.706   | -0.011                  |
| N1---I2''              | 3.756     | 3.781   | 0.025                   |
| N1---I3'               | 3.723     | 3.721   | -0.002                  |
| N1---I1'               | 4.210     | 4.220   | 0.010                   |

'-' signs denotes the decrease in the inter atomic distances upon cooling.

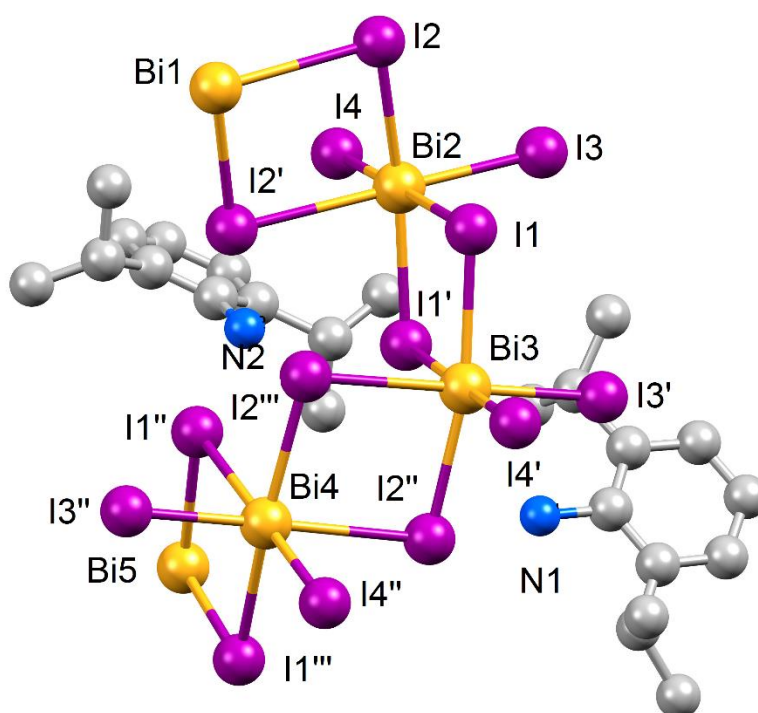

Figure S3: Atom labels for compound **1**.

---

<sup>1</sup> a) P. Kubelka, *J. Opt. Soc. Am.*, 1948, **38**, 448; b) P. Kubelka, *J. Opt. Soc. Am.*, 1954, **44**, 330; c) A. B. Murphy, *J. Phys. D: Appl. Phys.*, 2006, **39**, 3571; d) N. Laidani, R. Bartali, G. Gottardi and M. Anderle, *J. Phys.: Condens. Matter*, 2008, **20**, 15216.

<sup>2</sup> A. Altomare, G. Cascarano, C. Giacovazzo and A. Guagliardi, *J. Appl. Crystallogr.*, 1994, **27**, 435.

<sup>3</sup> G. M. Sheldrick, *Acta Cryst.* 2008, **A64**, 112.
